# Supplementary material
Source: HighWire-hosted journal article supplement (https://www.cmajopen.ca/highwire/filestream/87512/field_highwire_adjunct_files/7/open-2020-0274-original-submission.pdf)
Supplement: open-2020-0274-original-submission.pdf [file open-2020-0274-original-submission.pdf]

**Title:** The 2018 Global Point Prevalence Survey of Antimicrobial Consumption and Resistance in 47 Canadian Hospitals

**Authors:** Greg J. German<sup>1\*</sup>, MD PhD; Charles Frenette<sup>2\*</sup>, MD; Jean-Alexandre Caissy<sup>3</sup>, BSc; Jennifer Grant<sup>4</sup>; Marie-Astrid Lefebvre<sup>5</sup>, MD; Dominik Mertz<sup>6</sup>, MD; Jennifer Boswell<sup>7</sup>, BScPharm; Sarah Lutes<sup>7</sup>, BSc; Allison McGeer<sup>8</sup>, MD; Jacqueline Roberts<sup>9</sup>, BScPharm; Kevin Afra<sup>10</sup>, MD; Louis Valiquette<sup>11</sup>, MD; Yannick Émond<sup>12</sup>, MD; Marie Carrier<sup>13</sup>, BPharm, MSc; Anaïs Lauzon-Laurin<sup>14</sup>, MD; Trong Nguyen<sup>15</sup>, MD; Hamed Al-Bachari<sup>16</sup>, MD; Justin Kosar<sup>17</sup>, BSP; Shaquil Peermohamed<sup>17</sup>, MD; Michelle Science<sup>18</sup>, MD; Daniel Landry<sup>19</sup>, BSc Pharmacy; Timothy MacLaggan<sup>20</sup>, PharmD; Peter Daley<sup>21</sup>, MD; Gerry McDonald<sup>21</sup>, BSc; Anita Ang<sup>22</sup>, MSc; Sandra Chang<sup>23</sup>, PharmD; Yu-Chen Lin<sup>24</sup>, PharmD; Brandon Tong<sup>25</sup>, PharmD; Suzanne Malfair<sup>24</sup>, PharmD; Victor Leung<sup>26</sup>, MD; Kevin Katz<sup>27</sup>, MD; Ines Pauwels<sup>28</sup>, MSc; Herman Goossens<sup>28</sup>, MD; Ann Versporten<sup>28</sup>, MPH; John Conly<sup>29</sup>, MD; Daniel J. G. Thirion<sup>2,3</sup>, MSc, PharmD

**Affiliations:** <sup>1</sup>Health PEI, 16 Garfield St, Charlottetown, Prince Edward Island, Canada, C1A 6A5; <sup>2</sup>McGill University Health Center, 1001 Decarie Blvd, Montreal, Quebec, Canada, H4A 3J1; <sup>3</sup>Faculty of Pharmacy, Université de Montréal, 2940 Chemin de Polytechnique, Montreal, Quebec, Canada, H3T 1J4; <sup>4</sup>Vancouver General Hospital, 899 W12th Ave, Vancouver, British Columbia, Canada, V5Z 1M9; <sup>5</sup>Montreal Children Hospital, 1001 Decarie Blvd, Montreal, Quebec, Canada, H4A 3J1; <sup>6</sup>McMaster University and Hamilton Health Sciences, 711 Concession Street, Hamilton, Ontario, Canada, L8V 1C3; <sup>7</sup>Health PEI, 60 Riverside Drive, Charlottetown, Prince Edward Island, Canada, C1A 8T5; <sup>8</sup>Mount Sinai Hospital, 600 University Ave, Toronto, Ontario, Canada, M5G 1X5; <sup>9</sup>Perth and Smiths Falls District Hospital 60 Cornelia St W Smiths Falls, Ontario K7A 2H9; <sup>10</sup>Fraser Health, Suite 400 – 13450 102 Ave, Surrey, British Columbia, V3T 5X4; <sup>11</sup>Université de Sherbrooke, 3001 12th Ave North, Sherbrooke, Quebec, Canada, J1H 5N4; <sup>12</sup>Hôpital Maisonneuve-Rosemont, 5415 Boulevard de l'Assomption, Montréal, Quebec, Canada, H1T 2M4; <sup>13</sup>CIUSSS de la Mauricie et du Centre-du-Québec, Trois-Rivières, Quebec, Canada; <sup>14</sup>CISSS de Lanaudière, Joliette, Quebec, Canada; <sup>15</sup>McGill University, Montreal, Quebec, Canada; <sup>16</sup>Department of Microbiology and Immunology, Université de Montréal, Montréal, Quebec, Canada; <sup>17</sup>Saskatchewan Health Authority, Saskatoon, Saskatchewan, Canada, S7N 0W8; <sup>18</sup>The Hospital for Sick Children, 555 University Ave, Toronto, Ontario, Canada, M5G 1X8; <sup>19</sup>Dr. Georges-L.-Dumont University Hospital Centre, Vitalité Health Network, Moncton, New Brunswick, Canada; <sup>20</sup>Horizon Health Network, Moncton, New Brunswick, Canada; <sup>21</sup>Memorial University of Newfoundland, Discipline of Medicine, Room 1J421 Health Sciences Center, 300 Prince Phillip Dr, St. John's, NL, Canada A1V 3V6; <sup>22</sup>Département de Pharmacie, Centre Hospitalier de l'Université de Montréal, Montréal, Quebec, Canada; <sup>23</sup>Richmond Hospital, 7000 Richmond Hwy, Richmond, British Columbia, Canada, V6X 1A2; <sup>24</sup>Lions Gate Hospital, The University of British Columbia, 231 15th Street E, Vancouver, British Columbia, Canada, V7L 2L7; <sup>25</sup>Faculty of Pharmaceutical Sciences, University of British Columbia,

1  
2  
3 2405 Wesbrook Mall, Vancouver, British Columbia, Canada, V6T 1Z3; <sup>26</sup>Infection  
4 Prevention and Control, Providence Health Care 1190 Hornby St, 5<sup>th</sup> Floor, Vancouver,  
5 British Columbia, Canada V6Z 2K5; <sup>27</sup>North York General Hospital, 4001 Leslie St, North  
6 York, ON, Canada, M2K 1E1; <sup>28</sup>Laboratory of Medical Microbiology, Vaccine &  
7 Infectious Disease Institute, University of Antwerp, Antwerp, Belgium; <sup>29</sup>University of  
8 Calgary and Alberta Health Services, Foothills Medical Centre 1620 29 St NW, Calgary,  
9 Alberta, Canada, T2N 4L7  
10  
11

12 **Correspondance:** Daniel J.G. Thirion, MSc, PharmD, FCSHP

13  
14 Faculté de pharmacie, Université de Montréal

15  
16 PO Box 6128, succ. Centre-ville

17  
18 Montreal, Quebec, Canada

19  
20 H3C 3J7

21  
22 Tel: 514-343-6111 ext 5207

23  
24 Fax: 514-343-6120

25  
26 E-mail: [daniel.thirion@umontreal.ca](mailto:daniel.thirion@umontreal.ca)

27 **Keywords:** benchmarking, antimicrobial use, nosocomial infection, antibiotic  
28 stewardship, antibiotic resistance, community acquired infection  
29  
30  
31  
32  
33  
34  
35  
36  
37  
38  
39  
40  
41  
42  
43  
44  
45  
46  
47  
48  
49  
50  
51  
52  
53  
54  
55  
56  
57  
58  
59  
60

## Abstract

### *Background*

Patient-level surveillance of antimicrobial use (AMU) in Canadian hospitals is needed to reduce antimicrobial overuse and misuse and was piloted in 2017 amongst 14 hospitals in Canada. Continued surveillance is needed to identify trends and opportunities for interventions and measure the impact of interventions. The Global Point Prevalence Survey of Antimicrobial Consumption and Resistance (Global-PPS) is an international collaborative to monitor antimicrobial use and resistance in hospitals worldwide. This paper presents the results of the 2018 Global-PPS in Canadian hospitals.

### *Methods*

Canadian adult, pediatric and neonatal hospitals (n=118) were invited to participate in this web-based cross-sectional survey. All surveys except for one institution were performed in the 2018 calendar year. All in-patient wards in each hospital were surveyed according to the Global-PPS methodology.

### *Results*

Forty-seven of 118 (40%) hospitals participated in the survey. Of 13 272 patients included, 4447 (33.5%) received a total of 6171 antimicrobials. Overall, 74.1% (n=4832) of antimicrobials were for therapeutic use, 12.6% (n=825) were for medical prophylaxis, 8.9% (n=578) were for surgical prophylaxis (SP), 2.2% (n=143) for other use and 2.3% (n=147) were for unidentified reasons.

### *Interpretation*

AMU is overall similar to what was previously reported in Canada (33.5%). Documentation of indication for therapeutic use was high (87%). Rational use of antimicrobials adhered to guidelines (84%) and seemingly prioritized single dose of SP. Though guideline availability was lower in the Atlantic Provinces, new protocols have since been implemented.

## Introduction

Antimicrobial resistance (AMR) is a substantial threat to public health<sup>1</sup> and increases mortality, morbidity and healthcare cost<sup>2</sup>. Antimicrobial overuse and misuse accelerates AMR development<sup>1,3</sup>. A global response is warranted to ensure rational antimicrobial use (AMU) given that AMR is commutable between countries. In 2017, Canada has released the *Framework for Action* on AMR and AMU to reinforce its strategy on AMR and to complement the World Health Organisation *Global Action Plan on Antimicrobial Resistance*<sup>4,5</sup>. Surveillance of AMU is a core component of the *Framework for Action*, as it allows trend monitoring and identification of areas of concerns. The Canadian Nosocomial Infection Surveillance Program (CNISP) monitors AMU in participating hospitals using daily defined doses (DDDs) with monthly data points<sup>6</sup>. However, this method lacks patient-level and qualitative information; most notably the indication, appropriate choice, dosing and duration of antimicrobials, which are required to interpret quantitative aspects and guide stewardship interventions<sup>7</sup>. Patient-level surveillance of AMU is a key factor in reducing antimicrobial overuse and misuse. Recently, CNISP has published the results of 3 national point-prevalence surveys (PPSs), limited to healthcare-acquired infections (HAIs)<sup>8</sup>. In Canada, patient-level AMU surveillance performed on a national level has been done through a pilot PPS in 2017 which only included 14 hospitals<sup>9</sup>. A broader Canadian sample will allow for trend identification, evaluation of impact of interventions and benchmarking in the future.

The Global Point Prevalence Survey of Antimicrobial Consumption and Resistance (Global-PPS) is an international collaborative created in 2014 to monitor antimicrobial use and resistance in hospitals worldwide. Global-PPS locally documents, on a single day, patient-level antimicrobial prescribing practices. The advantage of the Global-PPS's standardized surveillance method is that it is adapted to all types of hospitals and allows data comparison locally, nationally and internationally. Global-PPS identifies areas of improvement and, through repeat surveys, measures the impact of interventions. This article presents the results of the 2018 Global-PPS in Canadian hospitals.

## Methods

### *Objective and Design*

The objective of this cross-sectional study was to evaluate antimicrobial use and resistance in Canadian hospitals. The primary outcome was to measure antimicrobial prescribing rates, antimicrobial indications and agent selection in medical, surgical and intensive care wards. The secondary outcome was to measure resistance rates and compare results to the 2017 Global-PPS survey. In order to ensure comparability between Global-PPS studies, the methodology employed in this study was the same as the 2017 pilot survey<sup>10</sup>.

### *Setting and Participants*

Adult, pediatric and neonatal hospitals in Canada were invited to participate in the 2018 Global-PPS through the CNISP, the Association of Medical Microbiology and Infectious Disease Canada and the *Association des Médecins Microbiologistes-Infectiologues du Québec*. Surveys were performed between June and December 2018; one hospital performed the study beginning January 2019. All in-patient wards were surveyed once on a single day; however, different wards could be surveyed on separate days. Wards were not surveyed on a weekend or a holiday. Surgical wards were not surveyed on a day following a weekend or holiday in order to better represent a routine weekday regarding information on the duration of surgical prophylaxis (SP).

On the day of the survey, detailed data was collected for all admitted inpatients receiving an antimicrobial as of 0800 h. A patient was considered receiving an antimicrobial if the agent was one of the following: systemic antibiotics, antibiotics used as intestinal anti-infectives, systemic antimycotics and antifungals, antituberculosis agents, nitroimidazole derivatives and antiprotozoals used as antibiotic agents, antivirals and antimalarials. Topical antimicrobials were excluded.

1  
2  
3 Participation in the Global-PPS was either considered exempt as quality assurance  
4 projects or approved by the research ethics boards at participating hospitals if required by  
5 institution-specific policies.  
6  
7  
8  
9

#### 10 *Data collection*

11 A physician, pharmacist or nurse with some infectious disease training performed  
12 the survey. An administrator per site provided oversight to ensure survey completion. The  
13 necessary detailed information was retrieved from medical charts and was not discussed  
14 with the ward staff nor was direct feedback provided to enhance objective data collection.  
15 The Global-PPS utilizes a uniform standardized surveillance method for all hospitals.  
16  
17  
18  
19  
20  
21

22 Data collected for each patient on antimicrobial therapy included age, weight,  
23 gender and antimicrobial agent. For each antimicrobial received, the following information  
24 was collected: dose, route, diagnosis, indication, and a set of quality indicators such as  
25 diagnosis documented in the chart at the start of the antimicrobial, local guideline  
26 compliance, stop/review date documented and whether therapy was empirical or targeted.  
27 The treating physician's diagnosis was recorded based on standardized categories<sup>11</sup>. Type  
28 of indication was categorized based on standardized definitions and included: community-  
29 acquired infection (CAI), healthcare-associated infection (HAI), surgical prophylaxis (SP)  
30 as one dose, one day or more than one day, medical prophylaxis (MP) defined as  
31 prophylaxis not related to surgery (e.g. antifungals for chemotherapy), other, and  
32 unknown<sup>11</sup>. If therapy was targeted, the targeted multidrug resistance type was recorded.  
33 Finally, biomarker data were recorded (C-reactive protein, procalcitonin or other) if they  
34 supported prescribing decisions. Antibiotics were categorized using the World Health  
35 Organization AWaRe classification<sup>12</sup>.  
36  
37  
38  
39  
40  
41  
42  
43  
44  
45  
46  
47

#### 48 *Data analysis*

49 Antimicrobial consumption data is presented in terms of proportions and/or 95%  
50 confidence interval (CI). Prevalence of antimicrobial prescribing is presented as the  
51 proportion of patients on at least one antimicrobial compared to the number of inpatients  
52 on the ward. A patient on single or multiple antimicrobials had the same weight in the  
53  
54  
55  
56  
57  
58  
59  
60

1  
2  
3 numerator. Biomarker data and dose differences between patients for the same  
4 antimicrobial were not analyzed.  
5  
6  
7

## 8 **Results**

9  
10 Forty-seven of 118 Canadian hospitals participated in the 2018 Global-PPS and  
11 data from all hospitals were included in the study. The median (interquartile range) hospital  
12 size was 276 (157-465.5) beds. Thirty hospitals were university-affiliated centers. Eleven  
13 hospitals were from Western Canada (BC and SK), 22 from Central Canada (ON and QC)  
14 and 14 from the Atlantic Provinces (NB, NL, NS and PE). Nine hospitals were primary  
15 care centers (10.0% of patients), 15 were secondary care centers (29.7% of patients) and  
16 23 were tertiary/specialized care centers (60.3% of patients). Two tertiary care centers were  
17 exclusively pediatric centers. Overall, 802 units and 13 272 patients were included in the  
18 survey; about 1 in every 6 acute care beds in Canada were surveyed<sup>13</sup>. Table 1 presents  
19 baseline patient characteristics (age of neonates was not recorded due to privacy reasons).  
20  
21  
22  
23  
24  
25  
26  
27  
28

### 29 *Antimicrobial Prevalence*

30  
31 Of the 13 272 admitted inpatients, 4447 (33.5%; 95% CI, 30.7%-36.2%) received  
32 a total of 6525. Almost one-third (29.3%) of patients in primary care centers received  
33 antimicrobials, 31.0% in secondary care centers and 35.4% in tertiary/specialized care  
34 centers (Table 2). 34% of adults, 35.8% of pediatric patients and 15.7% of neonates  
35 received at least one antimicrobial (Table 3). Therapeutic use was highest in primary and  
36 secondary care centers (80.1% and 80.5% respectively), while medical prophylaxis in  
37 tertiary/specialized centers was more than double that of other hospital types (Table 2).  
38  
39  
40  
41  
42  
43  
44

### 45 *Therapeutic use*

46  
47 Therapeutic use accounted for the majority of antimicrobial prescriptions (74.1%  
48 in adults, 65.1% in pediatric patients and 58.1% in neonates [Table 4-5a/b]); treatment  
49 being targeted in 39.4% of cases. Overall, 29.6% of antimicrobials were for respiratory  
50 tract (1431/4832), 11.5% for urinary (554/4832) 11.0% for intra-abdominal (531/4832),  
51 10.3% (496/4832) for skin and soft tissue (496/4832) and 7.3% for bone and joint  
52 (355/4832) infections (Table 6). The overall prevalence of patients presenting HAIs was  
53  
54  
55  
56  
57  
58  
59  
60



1  
2  
3 9.2% (1225/13272); 9.5% (1184/12438) in adults and 4.9% (41/834) in pediatric/neonatal  
4 wards. Community-acquired pneumonia (CAP) accounted for 14.4% (694/4832) of  
5 antimicrobials while healthcare-acquired pneumonia (HAP) accounted for 9.1%  
6 (438/4832). Empirical treatment accounted for 60.6% (2926/4832) of all antimicrobials for  
7 therapeutic use and targeted treatment accounted for 39.4% (1906/4832). Of 3014  
8 antimicrobials for CAIs, 1896 (62.9%) were empirical treatment and 1118 (37.1%) were  
9 targeted treatment. Of the 1818 antimicrobials for HAIs, 1030 (56.7%) were empirical  
10 treatment and 788 (43.3%) were targeted treatment.  
11  
12  
13  
14  
15  
16  
17

### 18 *Medical prophylaxis*

19  
20 Antibiotics were the most commonly prescribed antimicrobials for MP (52.0%,  
21 429/825; Supplementary Table 1). Antivirals were the second most prescribed (26.7%,  
22 220/825). Combination of sulfonamides and trimethoprim was the most prescribed agent  
23 (22.4%, 185/825).  
24  
25  
26  
27  
28

### 29 *Surgical prophylaxis*

30  
31 Cefazolin accounted for the majority of surgical antimicrobial prophylaxis  
32 prescriptions (69.7%). Overall, 36% of patients received a single dose of SP, 33% received  
33 prophylaxis for a duration of 1 day and 32% for more than 1 day. Supplementary Material  
34 Table 2 presents antimicrobial prevalence by SP site in wards.  
35  
36  
37  
38

### 39 *Antimicrobial Class Prevalence*

40  
41 Antibiotics accounted for 83.6% of antimicrobials prescribed (5454/6525; Table 7).  
42 Penicillins with  $\beta$ -lactamase inhibitors (19.1%, 1042/5454), 1<sup>st</sup> generation cephalosporins  
43 (13.4%, 730/5454), 3<sup>rd</sup> generation cephalosporins (11.1%, 606/5454) and fluoroquinolones  
44 (10.7%, 583/5454) were the most common antibiotics prescribed. Individually, piperacillin  
45 with  $\beta$ -lactamase inhibitors (12.3%), cefazolin (9.7%), ceftriaxone (8.1%), vancomycin  
46 (6.9%) and ciprofloxacin (5.9%) were the most commonly prescribed antimicrobials. For  
47 the treatment of pneumonia, the combination of a penicillins with a  $\beta$ -lactamase inhibitor  
48 (27.2%) or 3<sup>rd</sup> generation cephalosporin monotherapy (19.3%) or fluoroquinolone  
49 monotherapy (12.5%) accounted for more than half of the antibiotics prescribed. Antivirals  
50  
51  
52  
53  
54  
55  
56  
57  
58  
59  
60



1  
2  
3 (7.3%), antifungals (7.2%), antimalarial agents (1.1%) and antituberculosis agents (0.7%)  
4 respectively followed antibiotics in prevalence. Antimicrobials indication for HAI and CAI  
5 is described in Fig.1a/b and Fig.2.  
6  
7  
8  
9

### 10 *Antibiotic stewardship*

11 A diagnosis/indication was documented in the patient's file at the initiation of 87%  
12 antimicrobials (5699/6525). Sixty-three percent of antimicrobials had a stop/review date  
13 documented in the patient's file. Local guidelines were present to guide 75% of  
14 prescriptions and 84% of prescriptions were judged as complying with the recommended  
15 antimicrobial choice. Compliance to guideline was highest in Western Canada (86.7%) and  
16 lowest in Atlantic Provinces (71.5%). Stewardship data is presented in Table 4.  
17  
18  
19  
20  
21  
22  
23

### 24 *Antimicrobial Resistance*

25 A total of 353 multidrug resistant organisms (MDROs) were identified in the 3548  
26 patients for which AMU was for therapeutic use (9.9%). Of those, 16.7% (186/1116), 7.5%  
27 (135/1731), and 6.1% (37/611) were in the Western, Central and Atlantic regions of  
28 Canada. The most frequent MDROs were methicillin-resistant *Staphylococcus aureus*  
29 (MRSA) (23.2%, 82/353). The prevalence of patients presenting an MRSA infection was  
30 4.6%, 1.7% and 0.2% in the Western, Central and Atlantic regions of Canada, respectively.  
31 Resistance rate are presented based on targeted treatment in Table 8.  
32  
33  
34  
35  
36  
37  
38  
39

### 40 **Interpretation**

41 This study is the largest nationwide PPS to measure AMU using patient-level data  
42 in Canada and serves as a benchmark for future Global-PPS studies. The data provided in  
43 this study is considered representative of the Canadian population as it included 18% of  
44 acute care beds in hospitals spanning the 3 major regions of Canada and 7/10 provinces.  
45 AMU on medical, surgical and intensive care wards is similar to those previously reported  
46 in Canada. As seen in the 2017 pilot study<sup>9</sup>, respiratory tract infections accounted for the  
47 majority of infections treated in all wards except for surgical wards, where intra-abdominal  
48 infections were most prevalent. The proportion of antimicrobial use varied significantly  
49 between indications. For CAP, 3<sup>rd</sup> generation cephalosporins were the most commonly  
50  
51  
52  
53  
54  
55  
56  
57  
58  
59  
60

1  
2  
3 used antimicrobials while penicillins with  $\beta$ -lactamase inhibitors were most prevalent for  
4 the treatment of HAP. Agent selection for CAP and HAP is similar to previously reported  
5 worldwide and European rates<sup>11</sup>. However, lower use of penicillins with  $\beta$ -lactamase  
6 inhibitors was reported in the United-States, where levofloxacin alone predominated in  
7 CAP and HAP<sup>11</sup>.  
8  
9  
10  
11  
12

13 From 2002 to 2017, a significant decrease in HAI prescriptions has been observed  
14 in Canada<sup>8</sup>. When comparing our results to the 2017 survey<sup>9</sup>, this decrease appears to have  
15 been maintained in 2018. At patient level, similar rates of HAIs have been reported  
16 worldwide in 2015<sup>11</sup> and in Europe in 2016-2017<sup>14</sup>. Our data indicates that piperacillin-  
17 tazobactam is ahead of cefazolin in terms of AMU compared to previous observations<sup>6</sup>.  
18 We observe a general continuation in the order of most used antimicrobials between 2016  
19 and 2018 in Canada. A major decrease in fluoroquinolone use was previously observed in  
20 Canadian hospital part of the CNISP network<sup>6</sup>. Relative to PPSs performed in 2002, 2009  
21 and 2017, our results are in line with this trend<sup>9,15</sup>.  
22  
23  
24  
25  
26  
27  
28  
29  
30

31 The proportion of patients receiving a single dose of SP has more than tripled in  
32 2018, whereas receiving SP for more than one day has decreased by 20%<sup>9</sup>. In Europe, SP  
33 for more than 1 day represents 54% of SP prescription<sup>14</sup> while 31% was reported in this  
34 study. Our results indicate a trend towards SP being administered for no more than one day  
35 in Canada. On any given day, the indication for a prescription was identified in the vast  
36 majority of cases (87%). However, a significant proportion of antimicrobial prescription in  
37 the Atlantic Canadian Provinces were not guided by local guidelines (53% vs. 25% national  
38 average); their implementation could help reduce misuse and/or overuse in this region.  
39 Moreover, higher guideline availability appears to correlate with higher rates of targeted  
40 treatments in this study (Table 4). Nevertheless, almost identical compliance to guidelines  
41 was observed in 2018 compared to previous Canadian<sup>9</sup> and European rates<sup>14</sup>. Despite  
42 similar compliance, the decrease in antimicrobial use in pediatric patients and neonates,  
43 combined with the seemingly prioritized single dose of SP over SP for more than one day  
44 may indicate a more rational use of antimicrobial across Canada. However, further  
45 evaluation should be performed to assess the impact of these changes.  
46  
47  
48  
49  
50  
51  
52  
53  
54  
55  
56  
57  
58  
59  
60

1  
2  
3  
4  
5 As seen in the 2017 survey, MRSA is still the most frequently treated MDRO<sup>9</sup>. The  
6 rate of MRSA infection has been increasing since 2012 and this trend is believed to be  
7 driven by the increasing rate of community-acquired MRSA<sup>16</sup>. A significant proportion of  
8 MDROs were identified in the western Canadian regions (16.7% vs. 9.9% national  
9 average). MDROs were generally more uncommon in the Atlantic Provinces. The lower  
10 prevalence of MRSA in the Atlantic (0.2% vs. 2.3% national average) appears to correlate  
11 with the lower empirical use of vancomycin in these regions (2.6% vs. 4.6% national  
12 average). Indeed, as vancomycin is usually recommended when treating an MRSA  
13 infection<sup>17</sup>, the prevalence of vancomycin being driven by the prevalence of MRSA is  
14 plausible. This association is maintained for the rest of Canada.  
15  
16  
17  
18  
19  
20  
21  
22  
23

24 Future PPSs will be performed to establish meaningful trends in AMU across  
25 Canadian hospitals by region, hospital types and individual hospitals. Higher rates of AMU  
26 and lower rates of HAIs are reported in the United-States<sup>18,19</sup>, however, the difference in  
27 reporting methodology and period between surveys prevent rigorous comparison between  
28 countries. When similar methodology is used, antimicrobial prevalence reported in this  
29 study (33.5% of patients; 95% CI, 30.7%-36.2%) is in line with previously reported global  
30 and European rates<sup>11,14</sup>.  
31  
32  
33  
34  
35  
36  
37

### 38 **Limitations**

39 The main limitation of PPSs is inherent to the method of a cross-sectional survey,  
40 namely the interpretation of data acquired at a single point in time. Although day-to-day  
41 variations occur, PPSs have moderate correlation with antimicrobial consumption  
42 measured in DDD for the month and season of the PPS<sup>20</sup>. However, surveys were  
43 performed between June and December (one in January), which may partially correct for  
44 seasonal variation. The PPS was carried out at centers where identification of  
45 microorganism and stewardships programs are mostly available, introducing selection and  
46 representiveness bias; performing a PPS in hospitals where this expertise is not available  
47 is of future interest. A total of 14 hospitals participated in the 2017 survey while 47  
48 participated in 2018; comparison may be limited. Differences in surveyors, regarding  
49  
50  
51  
52  
53  
54  
55  
56  
57  
58  
59  
60

1  
2  
3 compliance to guideline, may also be a source of bias. A missing component of the survey  
4 was the validity of the infectious disease diagnosis. The surveyor recorded what the  
5 physician intended to treat as recorded in the medical files, which is not based on clinical  
6 case definitions provided with the Global-PPS protocol. A substantial proportion of  
7 inappropriate use is due to inaccurate diagnosis<sup>21</sup>; however, it is currently beyond the scope  
8 of the Global-PPS. Future areas of considerations include the use of diagnostic codes and  
9 stewardship, graded appropriateness and collection of data regarding allergies to  
10 antimicrobials.  
11  
12  
13  
14  
15  
16  
17

## 18 **Conclusion**

19  
20 This study provided valid and reliable results on antimicrobial prescribing practices  
21 in Canadian hospitals. The results will support national and local stewardship programs.  
22 Though AMU was overall similar to what was previously reported in Canada, a more  
23 rational use of antimicrobials may be put forward with the seemingly decreased prevalence  
24 of AMU in pediatric and neonatal patients combined to the prioritized SP as one dose rather  
25 than for more than a day. Adherence to guideline was high throughout Canada (84%),  
26 however their availability was lower in the Atlantic Provinces. New protocols have since  
27 been developed in these regions. Further PPSs will allow for more robust trend  
28 identification and evaluation of interventions.  
29  
30  
31  
32  
33  
34  
35  
36  
37  
38  
39

## 40 **Acknowledgement:**

41 This research received no external funding.

42 The Global Point Prevalence Survey is coordinated at the University of Antwerp, Belgium  
43 and sponsored through an unrestricted grant by bioMérieux.  
44  
45  
46  
47  
48  
49  
50  
51  
52  
53

- 54 1. Ventola CL. The antibiotic resistance crisis: part 1: causes and threats. *P & T: a*  
55 *peer-reviewed journal for formulary management*. 2015;40:277-83.  
56  
57  
58  
59  
60

- 1
  - 2
  - 3
  - 4
  - 5
  - 6
  - 7
  - 8
  - 9
  - 10
  - 11
  - 12
  - 13
  - 14
  - 15
  - 16
  - 17
  - 18
  - 19
  - 20
  - 21
  - 22
  - 23
  - 24
  - 25
  - 26
  - 27
  - 28
  - 29
  - 30
  - 31
  - 32
  - 33
  - 34
  - 35
  - 36
  - 37
  - 38
  - 39
  - 40
  - 41
  - 42
  - 43
  - 44
  - 45
  - 46
  - 47
  - 48
  - 49
  - 50
  - 51
  - 52
  - 53
  - 54
  - 55
  - 56
  - 57
  - 58
  - 59
  - 60
2. Abat C, Rolain JM, Dubourg G, Fournier PE, Chaudet H, Raoult D. Evaluating the Clinical Burden and Mortality Attributable to Antibiotic Resistance: The Disparity of Empirical Data and Simple Model Estimations. *Clin Infect Dis*. 2017;65:S58-s63.
  3. Michael CA, Dominey-Howes D, Labbate M. The antimicrobial resistance crisis: causes, consequences, and management. *Frontiers in public health*. 2014;2:145.
  4. WHO. Global Action Plan on Antimicrobial Resistance. 2015; <https://www.who.int/antimicrobial-resistance/global-action-plan/en/>. Accessed May 15, 2020.
  5. Pan-Canadian framework for action on antimicrobial resistance and antimicrobial use. *Canada communicable disease report*. 2017;43:217-9.
  6. Rudnick W, Science M, Thirion DJG, et al. Antimicrobial use among adult inpatients at hospital sites within the Canadian Nosocomial Infection Surveillance Program: 2009 to 2016. *Antimicrobial resistance and infection control*. 2020;9:32.
  7. McNeil V, Cruickshank M, Duguid M. Safer use of antimicrobials in hospitals: the value of antimicrobial usage data. *The Medical journal of Australia*. 2010;193:S114-7.
  8. Mitchell R, Taylor G, Rudnick W, et al. Trends in health care-associated infections in acute care hospitals in Canada: an analysis of repeated point-prevalence surveys. *CMAJ : Canadian Medical Association journal*. 2019;191:E981-e8.
  9. Frenette C, Sperlea D, German GJ, et al. The 2017 global point prevalence survey of antimicrobial consumption and resistance in Canadian hospitals. *Antimicrobial resistance and infection control*. 2020;9:104.
  10. The Global Point Prevalence Survey of Antimicrobial Consumption and Resistance. <https://www.global-pps.com/>. Accessed May 11, 2020.
  11. Versporten A, Zarb P, Caniaux I, et al. Antimicrobial consumption and resistance in adult hospital inpatients in 53 countries: results of an internet-based global point prevalence survey. *The Lancet. Global health*. 2018;6:e619-e29.
  12. WHO. The 2019 WHO AWaRe classification of antibiotics for evaluation and monitoring use. 2019; [https://www.who.int/medicines/news/2019/WHO\\_releases2019AWaRe\\_classification\\_antibiotics/en/](https://www.who.int/medicines/news/2019/WHO_releases2019AWaRe_classification_antibiotics/en/). Accessed May 15, 2020.
  13. Sutherland JM, Crump RT. Alternative level of care: Canada's hospital beds, the evidence and options. *Healthcare policy*. 2013;9:26-34.
  14. Plachouras D, Kärki T, Hansen S, et al. Antimicrobial use in European acute care hospitals: results from the second point prevalence survey (PPS) of healthcare-associated infections and antimicrobial use, 2016 to 2017. *Euro surveillance : European communicable disease bulletin*. 2018;23.
  15. Taylor G, Gravel D, Saxinger L, et al. Prevalence of antimicrobial use in a network of Canadian hospitals in 2002 and 2009. *The Canadian journal of infectious diseases & medical microbiology*. 2015;26:85-9.
  16. PHAC. Canadian Antimicrobial Resistance Surveillance System - Update 2018: Executive Summary. 2018; <https://www.canada.ca/en/public-health/services/publications/drugs-health-products/canadian-antimicrobial->

- 1  
2  
3 [resistance-surveillance-system-2018-report-executive-summary.html](#). Accessed  
4 July 3, 2020.
- 5 17. Liu C, Bayer A, Cosgrove SE, et al. Clinical Practice Guidelines by the Infectious  
6 Diseases Society of America for the Treatment of Methicillin-Resistant  
7 *Staphylococcus aureus* Infections in Adults and Children. *Clinical Infectious*  
8 *Diseases*. 2011;52:e18-e55.
- 9 18. Magill SS, O'Leary E, Janelle SJ, et al. Changes in Prevalence of Health Care-  
10 Associated Infections in U.S. Hospitals. *The New England journal of medicine*.  
11 2018;379:1732-44.
- 12 19. Magill SS, O'Leary E, Ray SM, et al. Antimicrobial Use in US Hospitals:  
13 Comparison of Results From Emerging Infections Program Prevalence Surveys,  
14 2015 and 2011. *Clinical Infectious Diseases*. 2020.
- 15 20. Lee SB, Thirion DJG, Irfan N, et al. Antimicrobial utilization data: Does point  
16 prevalence data correlate with defined daily doses? *Infection control and hospital*  
17 *epidemiology*. 2019;40:920-1.
- 18 21. Filice GA, Drekonja DM, Thurn JR, Hamann GM, Masoud BT, Johnson JR.  
19 Diagnostic Errors that Lead to Inappropriate Antimicrobial Use. *Infection control*  
20 *and hospital epidemiology*. 2015;36:949-56.
- 21  
22  
23  
24  
25  
26  
27  
28  
29  
30  
31  
32  
33  
34  
35  
36  
37  
38  
39  
40  
41  
42  
43  
44  
45  
46  
47  
48  
49  
50  
51  
52  
53  
54  
55  
56  
57  
58  
59  
60

| Item category                | Checklist Item                                     | Manuscript page                  |
|------------------------------|----------------------------------------------------|----------------------------------|
| Design                       | Describe survey design                             | 4                                |
| IRB                          | IRB approval                                       | 6                                |
|                              | Informed consent                                   | Not applicable                   |
|                              | Data protection                                    | Described in referenced protocol |
|                              |                                                    |                                  |
| Recruitment process          | Open survey versus closed survey                   | 5                                |
|                              | Contact mode                                       | 5                                |
| Survey administration        | Advertising the survey                             | Not applicable                   |
|                              | Web/E-mail                                         | 5                                |
|                              | Context                                            | 5                                |
|                              | Mandatory/voluntary                                | 6                                |
|                              | Incentive                                          | Not applicable                   |
|                              | Time/Date                                          | 5                                |
|                              | Randomization of items or questionnaire            | Described in referenced protocol |
|                              | Adaptive questioning                               | Described in referenced protocol |
|                              | Number of items                                    | Described in referenced protocol |
|                              | Number of screens                                  | Described in referenced protocol |
| Response rates               | Completeness check                                 | Described in referenced protocol |
|                              | Review step                                        | Described in referenced protocol |
|                              | Unique site visitor                                | 6                                |
|                              | View rate                                          | Not applicable                   |
|                              | Participation rate                                 | 7                                |
| Preventing multiple entries: | Completion rate                                    | Same as participation rate       |
|                              | Cookie used                                        | Described in referenced protocol |
|                              | IP check                                           | Described in referenced protocol |
|                              | Log file analysis                                  | Described in referenced protocol |
| Analysis                     | Registration                                       | Described in referenced protocol |
|                              | Handling of incomplete questionnaires              | Not applicable                   |
|                              | Questionnaire submitted with an atypical timestamp | 5                                |
|                              | Statistical correction                             | Not applicable                   |



- 1
- 2 **Section**
- 3 Method - Objective and Design
- 4 Method - Setting and Participants
- 5
- 6 Not applicable
- 7 Method - Objective and Design
- 8
- 9
- 10 Method - Setting and Participants
- 11 Method - Setting and Participants
- 12 Not applicable
- 13
- 14 Method - Setting and Participants
- 15 Method - Objective and Design
- 16 Method - Objective and Design
- 17
- 18 Not applicable
- 19 Method - Setting and Participants
- 20
- 21
- 22 Method - Objective and Design
- 23 Method - Objective and Design
- 24 Method - Objective and Design
- 25 Method - Objective and Design
- 26 Method - Objective and Design
- 27 Method - Objective and Design
- 28 Method - Objective and Design
- 29 Method - Objective and Design
- 30 Method - Data collection
- 31 Not applicable
- 32 Results
- 33 Results
- 34
- 35 Method - Objective and Design
- 36 Method - Objective and Design
- 37 Method - Objective and Design
- 38 Method - Objective and Design
- 39 Method - Objective and Design
- 40
- 41
- 42
- 43 Not applicable
- 44
- 45
- 46
- 47 Method - Setting and Participants
- 48 Not applicable
- 49
- 50
- 51
- 52
- 53
- 54
- 55
- 56
- 57
- 58
- 59
- 60

Confidential

STROBE Statement—Checklist of items that should be included in reports of *cross-sectional studies*

|                              | Item No | Recommendation                                                                                                                                                                                    | Completed            |
|------------------------------|---------|---------------------------------------------------------------------------------------------------------------------------------------------------------------------------------------------------|----------------------|
| <b>Title and abstract</b>    | 1       | (a) Indicate the study's design with a commonly used term in the title or the abstract                                                                                                            | Yes                  |
|                              |         | (b) Provide in the abstract an informative and balanced summary of what was done and what was found                                                                                               | Yes                  |
| <b>Introduction</b>          |         |                                                                                                                                                                                                   |                      |
| Background/rationale         | 2       | Explain the scientific background and rationale for the investigation being reported                                                                                                              | Yes                  |
| Objectives                   | 3       | State specific objectives, including any prespecified hypotheses                                                                                                                                  | Yes (and in methods) |
| <b>Methods</b>               |         |                                                                                                                                                                                                   |                      |
| Study design                 | 4       | Present key elements of study design early in the paper                                                                                                                                           | Yes                  |
| Setting                      | 5       | Describe the setting, locations, and relevant dates, including periods of recruitment, exposure, follow-up, and data collection                                                                   | Yes                  |
| Participants                 | 6       | (a) Give the eligibility criteria, and the sources and methods of selection of participants                                                                                                       | Yes                  |
| Variables                    | 7       | Clearly define all outcomes, exposures, predictors, potential confounders, and effect modifiers. Give diagnostic criteria, if applicable                                                          | Yes                  |
| Data sources/<br>measurement | 8*      | For each variable of interest, give sources of data and details of methods of assessment (measurement). Describe comparability of assessment methods if there is more than one group              | Yes                  |
| Bias                         | 9       | Describe any efforts to address potential sources of bias                                                                                                                                         | Yes                  |
| Study size                   | 10      | Explain how the study size was arrived at                                                                                                                                                         | Yes                  |
| Quantitative variables       | 11      | Explain how quantitative variables were handled in the analyses. If applicable, describe which groupings were chosen and why                                                                      | Yes                  |
| Statistical methods          | 12      | (a) Describe all statistical methods, including those used to control for confounding                                                                                                             | Yes                  |
|                              |         | (b) Describe any methods used to examine subgroups and interactions                                                                                                                               | Not applicable       |
|                              |         | (c) Explain how missing data were addressed                                                                                                                                                       | Not applicable       |
|                              |         | (d) If applicable, describe analytical methods taking account of sampling strategy                                                                                                                | Not applicable       |
|                              |         | (e) Describe any sensitivity analyses                                                                                                                                                             | Not applicable       |
| <b>Results</b>               |         |                                                                                                                                                                                                   |                      |
| Participants                 | 13*     | (a) Report numbers of individuals at each stage of study—eg numbers potentially eligible, examined for eligibility, confirmed eligible, included in the study, completing follow-up, and analysed | Yes                  |
|                              |         | (b) Give reasons for non-participation at each stage                                                                                                                                              | Not applicable       |

|                          |     |                                                                                                                                                                                                              |                |
|--------------------------|-----|--------------------------------------------------------------------------------------------------------------------------------------------------------------------------------------------------------------|----------------|
|                          |     | (c) Consider use of a flow diagram                                                                                                                                                                           | Not applicable |
| Descriptive data         | 14* | (a) Give characteristics of study participants (eg demographic, clinical, social) and information on exposures and potential confounders                                                                     | Yes            |
|                          |     | (b) Indicate number of participants with missing data for each variable of interest                                                                                                                          | Not applicable |
| Outcome data             | 15* | Report numbers of outcome events or summary measures                                                                                                                                                         | Yes            |
| Main results             | 16  | (a) Give unadjusted estimates and, if applicable, confounder-adjusted estimates and their precision (eg, 95% confidence interval). Make clear which confounders were adjusted for and why they were included | Yes            |
|                          |     | (b) Report category boundaries when continuous variables were categorized                                                                                                                                    | Yes            |
|                          |     | (c) If relevant, consider translating estimates of relative risk into absolute risk for a meaningful time period                                                                                             | Not applicable |
| Other analyses           | 17  | Report other analyses done—eg analyses of subgroups and interactions, and sensitivity analyses                                                                                                               | Not applicable |
| <b>Discussion</b>        |     |                                                                                                                                                                                                              |                |
| Key results              | 18  | Summarise key results with reference to study objectives                                                                                                                                                     | Yes            |
| Limitations              | 19  | Discuss limitations of the study, taking into account sources of potential bias or imprecision. Discuss both direction and magnitude of any potential bias                                                   | Yes            |
| Interpretation           | 20  | Give a cautious overall interpretation of results considering objectives, limitations, multiplicity of analyses, results from similar studies, and other relevant evidence                                   | Yes            |
| Generalisability         | 21  | Discuss the generalisability (external validity) of the study results                                                                                                                                        | Yes            |
| <b>Other information</b> |     |                                                                                                                                                                                                              |                |
| Funding                  | 22  | Give the source of funding and the role of the funders for the present study and, if applicable, for the original study on which the present article is based                                                | Yes            |

\*Give information separately for exposed and unexposed groups.

**Note:** An Explanation and Elaboration article discusses each checklist item and gives methodological background and published examples of transparent reporting. The STROBE checklist is best used in conjunction with this article (freely available on the Web sites of PLoS Medicine at <http://www.plosmedicine.org/>, Annals of Internal Medicine at <http://www.annals.org/>, and Epidemiology at <http://www.epidem.com/>). Information on the STROBE Initiative is available at [www.strobe-statement.org](http://www.strobe-statement.org).

**Table 1.** Baseline Patient Characteristics

|                   | <b>Average Age <math>\pm</math> Standard<br/>Deviation, years</b> | <b>Male, %</b> |
|-------------------|-------------------------------------------------------------------|----------------|
| Adult (n=12 438)  | 64.0 $\pm$ 17.9                                                   | 54.8           |
| Pediatric (n=427) | 7.6 $\pm$ 7.6                                                     | 59.1           |
| Neonatal (n=407)  | Not assessable                                                    | 72.1           |

Confidential

**Table 2.** Overall Antimicrobial Prevalence and Use by Hospital Type

|                                                    | <b>All types</b> | <b>Primary</b> | <b>Secondary</b> | <b>Tertiary and Specialized</b> |
|----------------------------------------------------|------------------|----------------|------------------|---------------------------------|
| Number of patients, N                              | 13 272           | 1325           | 3947             | 8000                            |
| Number of patients receiving antimicrobials, N (%) | 4447 (33.5)      | 388 (29.3)     | 1225 (31.0)      | 2834 (35.4)                     |
| Number of antimicrobials received, N               | 6525             | 518            | 1635             | 4372                            |
| Therapeutic Use, N (%)                             | 4832 (74.1)      | 415 (80.1)     | 1316 (80.5)      | 3101 (70.9)                     |
| Medical Prophylaxis, N (%)                         | 825 (12.6)       | 33 (6.4)       | 101 (6.2)        | 691 (15.8)                      |
| Surgical Prophylaxis, N (%)                        | 578 (8.9)        | 38 (7.3)       | 156 (9.5)        | 384 (8.8)                       |
| Other, or Unknown, N (%)                           | 290 (4.4)        | 32 (6.2)       | 62 (3.8)         | 196 (4.5)                       |

**Table 3.** Overall Antimicrobial Prevalence by Ward Type in Adult, Pediatric and Neonatal Patients

| <b>Adult</b>                                       | <b>All wards</b> | <b>AMW</b>  | <b>HO-AMW</b> | <b>T-AMW</b>  | <b>P-AMW</b> | <b>ASW</b>  | <b>AICU</b> |
|----------------------------------------------------|------------------|-------------|---------------|---------------|--------------|-------------|-------------|
| Number of patients on ward, N                      | 12 438           | 7686        | 420           | 142           | 159          | 3083        | 948         |
| Number of patients receiving antimicrobials, N (%) | 4230 (34.0)      | 2031 (26.4) | 205 (48.8)    | 113 (79.6)    | 91 (57.2)    | 1318 (42.8) | 472 (49.8)  |
| Number of antimicrobials received, N               | 6171             | 2753        | 387           | 305           | 196          | 1755        | 775         |
| <b>Pediatric and Neonatal</b>                      | <b>All wards</b> | <b>PMW</b>  | <b>GNMW</b>   | <b>HO-PMW</b> | <b>PSW</b>   | <b>PICU</b> | <b>NICU</b> |
| Number of patients on ward, N                      | 834              | 307         | 151           | 25            | 57           | 38          | 256         |
| Number of patients receiving antimicrobials, N (%) | 217 (26.0)       | 81 (26.4)   | 7 (4.6)       | 21 (84.0)     | 24 (42.1)    | 21 (55.3)   | 63 (24.6)   |
| Number of antimicrobials received, N               | 354              | 115         | 14            | 46            | 32           | 39          | 108         |

**Table 4.** Regional documentation for indications, planned duration or review, and adherence to local guidelines

|                                       | <b>Total</b>   | <b>West</b>    | <b>Central</b> | <b>Atlantic</b> |
|---------------------------------------|----------------|----------------|----------------|-----------------|
| Number of antimicrobials received, N  | 6525           | 2092           | 3372           | 1061            |
| Reasons in notes, N (%)               | 5699<br>(87.3) | 1899<br>(90.8) | 2922<br>(86.7) | 878<br>(82.8)   |
| Stop/Review date, N (%)               | 4106<br>(62.9) | 1357<br>(64.9) | 2095<br>(62.1) | 564<br>(53.2)   |
| Antimicrobials for therapeutic use, N | 4832           | 1572           | 2462           | 798             |
| Targeted treatments, N (%)            | 1906<br>(39.4) | 716<br>(45.5)  | 936<br>(38.0)  | 254<br>(31.8)   |
| <b>Guidelines compliance, N (%)</b>   |                |                |                |                 |
| Yes <sup>a</sup>                      | 3928<br>(84.3) | 1474<br>(86.7) | 2125<br>(85.0) | 329<br>(71.5)   |
| No information, diagnosis missing     | 224<br>(3.5)   | 65<br>(3.2)    | 118<br>(3.5)   | 41<br>(3.9)     |
| No guidelines available               | 1604<br>(24.7) | 281<br>(13.7)  | 763<br>(22.6)  | 560<br>(52.8)   |

<sup>a</sup>The rate of positive compliance is calculated as opposed to negative guideline compliance, excluding if information or guideline was missing



**Table 5a.** Antimicrobial Use by Ward Type for Adult, Pediatric and Neonatal Wards

| <b>Adult</b>                   | <b>All wards</b> | <b>AMW</b>  | <b>HO-AMW</b> | <b>T-AMW</b>  | <b>P-AMW</b> | <b>ASW</b>  | <b>AICU</b> |
|--------------------------------|------------------|-------------|---------------|---------------|--------------|-------------|-------------|
| Total number of antimicrobials | 6171             | 2753        | 387           | 305           | 196          | 1755        | 775         |
| Therapeutic Use, N (%)         | 4610 (74.7)      | 2319 (84.2) | 199 (51.4)    | 123 (40.3)    | 156 (79.6)   | 1205 (68.7) | 608 (78.5)  |
| Medical Prophylaxis, N (%)     | 749 (12.1)       | 227 (8.2)   | 175 (45.2)    | 178 (58.4)    | 37 (18.9)    | 73 (4.2)    | 59 (7.6)    |
| Surgical Prophylaxis, N (%)    | 567 (9.2)        | 86 (3.1)    | 4 (1.0)       | 0 (0.0)       | 1 (0.5)      | 403 (23.0)  | 73 (9.4)    |
| Other or Unknown, N (%)        | 245 (4.0)        | 121 (4.4)   | 9 (2.3)       | 4 (1.3)       | 2 (1.0)      | 74 (4.2)    | 35 (4.5)    |
| <b>Pediatric and Neonatal</b>  | <b>All wards</b> | <b>PMW</b>  | <b>GNMW</b>   | <b>HO-PMW</b> | <b>PSW</b>   | <b>PICU</b> | <b>NICU</b> |
| Total number of antimicrobials | 354              | 115         | 14            | 46            | 32           | 39          | 108         |
| Therapeutic Use, N (%)         | 222 (62.7)       | 90 (78.3)   | 12 (87.5)     | 17 (37.0)     | 20 (62.5)    | 24 (61.5)   | 59 (54.6)   |
| Medical Prophylaxis, N (%)     | 76 (21.5)        | 7 (6.1)     | 2 (14.3)      | 24 (52.2)     | 4 (12.5)     | 9 (23.1)    | 30 (27.8)   |
| Surgical Prophylaxis, N (%)    | 11 (3.1)         | 3 (2.6)     | 0             | 0             | 5 (15.6)     | 0           | 3 (2.8)     |
| Other or Unknown, N (%)        | 45 (12.7)        | 15 (13.0)   | 0             | 5 (10.9)      | 3 (9.4)      | 6 (15.4)    | 16 (14.8)   |

Abbreviations: AMW, adult medical ward; HO-AMW, hematology-oncology-AMW, T-AMW, transplant-AMW; P-AMW, pneumology-AMW; ASW, adult surgical ward; AICU, adult intensive care unit

1  
2  
3  
4  
5  
6  
7  
8  
9  
10  
11  
12  
13  
14  
15  
16  
17  
18  
19  
20  
21  
22  
23  
24  
25  
26  
27  
28  
29  
30  
31  
32  
33  
34  
35  
36  
37  
38  
39  
40  
41  
42  
43  
44  
45  
46  
47  
48  
49  
50  
51  
52  
53  
54  
55  
56  
57  
58  
59  
60

**Table 5b.** Antimicrobial Use by Region

|                                | <b>Total</b>   | <b>West</b>    | <b>Central</b> | <b>Atlantic</b> |
|--------------------------------|----------------|----------------|----------------|-----------------|
| Total number of antimicrobials | 6525           | 2092           | 3372           | 1061            |
| Therapeutic Use, N (%)         | 4832<br>(74.1) | 1572<br>(75.1) | 2462<br>(73.0) | 798<br>(75.2)   |
| Medical Prophylaxis, N (%)     | 825<br>(12.6)  | 241<br>(11.5)  | 467<br>(13.8)  | 117<br>(11.0)   |
| Surgical Prophylaxis, N (%)    | 578<br>(8.9)   | 198<br>(9.5)   | 293<br>(9.7)   | 87<br>(8.2)     |
| Other or Unknown, N (%)        | 290<br>(4.4)   | 81<br>(3.9)    | 150<br>(4.4)   | 59<br>(5.6)     |

Confidential

Table 6. Number of Antimicrobials for Community-Acquired and Hospital-Acquired Infectious Disease Indications

| Indication                      | Adults   |        |        | Pediatric and Neonatal |        |        |
|---------------------------------|----------|--------|--------|------------------------|--------|--------|
|                                 | Total, N | CAI, % | HAI, % | Total, N               | CAI, % | HAI, % |
| Overall                         | 4610     | 62.0   | 38.0   | 222                    | 70.3   | 29.7   |
| Central Nervous System          | 108      | 67.6   | 32.4   | 20                     | 80.0   | 20.0   |
| Eye                             | 8        | 87.5   | 12.5   | 1                      | 100    | 0      |
| Ear, Nose, Throat               | 142      | 47.2   | 52.8   | 15                     | 93.3   | 6.7    |
| Lung                            | 57       | 78.9   | 21.1   | 3                      | 100    | 0      |
| Upper Respiratory Tract         | 31       | 87.1   | 12.9   | 0                      | NA     | NA     |
| Bronchitis                      | 134      | 85.1   | 14.9   | 2                      | 100    | 0      |
| Pneumonia                       | 1100     | 61.2   | 38.8   | 32                     | 65.6   | 34.4   |
| Tuberculosis                    | 66       | 100    | 0      | 0                      | NA     | NA     |
| Cardiovascular                  | 139      | 57.6   | 42.4   | 1                      | 0      | 100    |
| GI Tract                        | 260      | 43.1   | 56.9   | 8                      | 75.0   | 25.0   |
| Intra-Abdominal                 | 516      | 65.9   | 34.1   | 15                     | 73.3   | 26.7   |
| Skin and Soft Tissue            | 484      | 66.7   | 33.3   | 11                     | 54.5   | 45.5   |
| Bone and Joint                  | 341      | 65.7   | 34.3   | 12                     | 91.7   | 8.3    |
| Lower Urinary Tract             | 300      | 48.7   | 51.3   | 1                      | 0      | 100    |
| Upper Urinary Tract             | 240      | 59.6   | 40.4   | 12                     | 91.7   | 8.3    |
| Obstetric/Gynaecologic (female) | 46       | 73.9   | 26.1   | 0                      | NA     | NA     |
| Genitourinary (male)            | 16       | 50.0   | 50.0   | 0                      | NA     | NA     |
| BAC                             | 143      | 56.6   | 43.4   | 13                     | 38.5   | 61.5   |
| Sepsis                          | 109      | 42.2   | 57.8   | 48                     | 60.4   | 39.6   |
| HIV                             | 116      | 100    | 0      | 0                      | NA     | NA     |
| FN                              | 104      | 38.5   | 61.5   | 14                     | 71.4   | 28.6   |
| PUO/PUO-HO                      | 48       | 45.8   | 54.2   | 9                      | 88.9   | 11.1   |
| Lymphatic                       | 3        | 100    | 0      | 0                      | NA     | NA     |
| Other                           | 70       | 68.6   | 31.4   | 3                      | 33.3   | 66.7   |
| Unknown                         | 29       | 69.0   | 31.0   | 2                      | 50.0   | 50.0   |

Abbreviations: CAI, community-acquired infectious disease; HAI, hospital-acquired infectious disease; GI, gastrointestinal; BAC, bacteremia with no clear anatomical site; FN, fever in neutropenic patient; PUO, pyrexia of unknown origin; PUO-HO, PUO in hematology-oncology patient; NA, not applicable

**Table 7a.** Antimicrobial Prevalence by Region

|                                                | <b>Total</b> | <b>West</b> | <b>Central</b> | <b>Atlantic</b> |
|------------------------------------------------|--------------|-------------|----------------|-----------------|
| <b>Total number of antimicrobials</b>          | 6525         | 2092        | 3372           | 1061            |
| <b>Antibiotics, N</b>                          | 5454         | 1729        | 2801           | 924             |
| <b>Antifungals, N</b>                          | 473          | 144         | 264            | 65              |
| <b>Antivirals, N</b>                           | 477          | 179         | 250            | 48              |
| <b>Antituberculosis agents, N</b>              | 47           | 26          | 13             | 8               |
| <b>Antimalarial agents, N</b>                  | 72           | 13          | 44             | 15              |
| <b>Other, N</b>                                | 46           | 10          | 25             | 11              |
| <b>Antibiotics by Class, %</b>                 |              |             |                |                 |
| Penicillins with $\beta$ -lactamase inhibitors | 19,1         | 19,3        | 20,0           | 16,1            |
| Penicillins with extended spectrum             | 1,8          | 1,5         | 2,1            | 1,3             |
| $\beta$ -lactamase-resistant penicillins       | 1,4          | 2,1         | 0,8            | 1,7             |
| $\beta$ -lactamase-sensitive penicillins       | 2,4          | 2,1         | 2,4            | 2,8             |
| 1 <sup>st</sup> generation cephalosporins      | 13,4         | 14,6        | 12,2           | 14,7            |
| 2 <sup>nd</sup> generation cephalosporins      | 1,6          | 1,5         | 1,4            | 2,6             |
| 3 <sup>rd</sup> generation cephalosporins      | 11,1         | 13,3        | 9,5            | 12,0            |
| 4 <sup>th</sup> generation cephalosporins      | 0,1          | 0,1         | 0,2            | 0,0             |
| 5 <sup>th</sup> generation cephalosporins      | 0,1          | 0,2         | 0,1            | 0,0             |
| Carbapenems                                    | 5,0          | 4,2         | 6,0            | 3,8             |
| Fluoroquinolones                               | 10,7         | 8,9         | 11,4           | 11,8            |
| Aminoglycosides                                | 2,1          | 1,0         | 2,9            | 1,7             |
| Macrolides                                     | 4,0          | 4,0         | 3,8            | 4,3             |
| Tetracyclines                                  | 2,5          | 2,0         | 2,7            | 2,5             |
| Clindamycin                                    | 1,3          | 1,3         | 1,5            | 1,0             |
| Metronidazole                                  | 5,3          | 5,9         | 4,1            | 7,9             |
| Combinations of sulfonamides and trimethoprim  | 5,7          | 4,7         | 6,2            | 6,0             |
| Linezolid                                      | 0,4          | 0,9         | 0,1            | 0,2             |
| Vancomycin PO                                  | 2,5          | 2,0         | 2,8            | 2,4             |
| Vancomycin IV                                  | 5,8          | 6,9         | 6,0            | 3,4             |
| Nitrofurantoin                                 | 1,1          | 1,0         | 0,9            | 1,7             |
| Colistin                                       | 0,3          | 0,1         | 0,4            | 0,0             |
| Daptomycin                                     | 0,5          | 0,7         | 0,5            | 0,0             |
| Rifamycins                                     | 1,1          | 1,1         | 1,1            | 1,0             |
| Other                                          | 0,7          | 1,0         | 0,1            | 0,2             |

**Table 7b.** Antimicrobial Prevalence by Class in Adult, Pediatric and Neonatal Wards

| <b>Adult</b>                                   | <b>All wards</b> | <b>AMW</b> | <b>HO-AMW</b> | <b>T-AMW</b>  | <b>P-AMW</b> | <b>ASW</b>  | <b>AICU</b> |
|------------------------------------------------|------------------|------------|---------------|---------------|--------------|-------------|-------------|
| <b>Total number of antimicrobials</b>          | 6171             | 2753       | 387           | 305           | 196          | 1755        | 775         |
| <b>Antibiotics, N</b>                          | 5153             | 2354       | 213           | 137           | 150          | 1621        | 678         |
| <b>Antifungals, N</b>                          | 442              | 144        | 85            | 78            | 11           | 65          | 59          |
| <b>Antivirals, N</b>                           | 457              | 196        | 86            | 79            | 15           | 49          | 32          |
| <b>Antituberculosis agents, N</b>              | 45               | 11         | 2             | 4             | 19           | 6           | 3           |
| <b>Antimalarial agents, N</b>                  | 72               | 47         | 1             | 6             | 1            | 14          | 3           |
| <b>Other, N</b>                                | 2                | 1          | 0             | 1             | 0            | 0           | 0           |
| <b>Antibiotics by Class, %</b>                 |                  |            |               |               |              |             |             |
| Penicillins with $\beta$ -lactamase inhibitors | 19,7             | 18,1       | 28,2          | 21,2          | 16,7         | 20,8        | 20,6        |
| Penicillins with extended spectrum             | 1,0              | 0,9        | 0,5           | 0,0           | 0,0          | 1,0         | 1,3         |
| $\beta$ -lactamase-resistant penicillins       | 1,4              | 1,9        | 0,5           | 0,0           | 0,0          | 1,2         | 1,0         |
| $\beta$ -lactamase-sensitive penicillins       | 2,3              | 3,5        | 2,3           | 0,7           | 2,0          | 1,2         | 0,9         |
| 1 <sup>st</sup> generation cephalosporins      | 13,8             | 9,8        | 2,8           | 1,5           | 2,7          | 24,2        | 10,9        |
| 2 <sup>nd</sup> generation cephalosporins      | 1,6              | 2,6        | 0,0           | 0,0           | 1,3          | 1,0         | 0,6         |
| 3 <sup>rd</sup> generation cephalosporins      | 10,8             | 13,0       | 3,3           | 4,4           | 8,0          | 8,3         | 13,3        |
| 4 <sup>th</sup> generation cephalosporins      | 0,2              | 0,0        | 0,5           | 0,0           | 0,7          | 0,2         | 0,1         |
| 5 <sup>th</sup> generation cephalosporins      | 0,1              | 0,1        | 0,0           | 0,0           | 0,0          | 0,1         | 0,4         |
| Carbapenems                                    | 5,1              | 4,0        | 8,9           | 10,2          | 8,0          | 3,3         | 10,2        |
| Fluoroquinolones                               | 11,1             | 12,4       | 14,6          | 8,8           | 15,3         | 10,9        | 5,9         |
| Aminoglycosides                                | 1,3              | 1,1        | 0,5           | 1,5           | 4,0          | 1,5         | 1,2         |
| Macrolides                                     | 4,1              | 5,3        | 0,9           | 3,6           | 10,0         | 1,9         | 4,9         |
| Tetracyclines                                  | 2,6              | 4,1        | 0,0           | 0,7           | 4,7          | 1,8         | 1,2         |
| Clindamycin                                    | 1,4              | 1,5        | 0,9           | 0,0           | 0,7          | 1,4         | 1,5         |
| Metronidazole                                  | 5,4              | 4,0        | 3,8           | 0,7           | 2,7          | 8,8         | 4,6         |
| Combinations of sulfonamides and trimethoprim  | 5,6              | 5,6        | 14,6          | 28,5          | 10,0         | 2,7         | 4,7         |
| Linezolid                                      | 0,4              | 0,4        | 0,0           | 0,0           | 1,3          | 0,4         | 0,3         |
| Vancomycin PO                                  | 2,6              | 3,1        | 3,8           | 5,1           | 0,7          | 1,8         | 2,2         |
| Vancomycin IV                                  | 5,9              | 4,8        | 10,8          | 8,8           | 2,7          | 4,5         | 11,4        |
| Nitrofurantoin                                 | 1,1              | 1,4        | 0,9           | 0,0           | 0,0          | 1,2         | 0,4         |
| Colistin                                       | 0,3              | 0,1        | 0,0           | 2,9           | 2,7          | 0,1         | 0,3         |
| Daptomycin                                     | 0,5              | 0,5        | 0,9           | 0,0           | 0,0          | 0,5         | 0,6         |
| Rifamycins                                     | 1,1              | 0,9        | 0,0           | 0,0           | 4,0          | 1,4         | 1,0         |
| Other                                          | 0,8              | 0,8        | 1,4           | 1,5           | 2,0          | 0,6         | 0,4         |
| <b>Pediatric and Neonatal</b>                  | <b>All wards</b> | <b>PMW</b> | <b>GNMW</b>   | <b>HO-PMW</b> | <b>PSW</b>   | <b>PICU</b> | <b>NICU</b> |
| <b>Total number of antimicrobials</b>          | 354              | 115        | 14            | 46            | 32           | 39          | 108         |
| <b>Antibiotics, N</b>                          | 301              | 106        | 14            | 30            | 32           | 33          | 86          |
| <b>Antifungals, N</b>                          | 31               | 2          | 0             | 12            | 0            | 5           | 12          |
| <b>Antivirals, N</b>                           | 20               | 6          | 0             | 3             | 0            | 1           | 10          |
| <b>Antituberculosis agents, N</b>              | 2                | 1          | 0             | 1             | 0            | 0           | 0           |
| <b>Antibiotics by Class, %</b>                 |                  |            |               |               |              |             |             |
| Penicillins with $\beta$ -lactamase inhibitors | 8,3              | 8,5        | 0,0           | 20,0          | 9,4          | 18,2        | 1,2         |
| Penicillins with extended spectrum             | 15,6             | 9,4        | 50,0          | 0,0           | 6,3          | 9,1         | 29,1        |
| $\beta$ -lactamase-resistant penicillins       | 1,7              | 0,0        | 0,0           | 0,0           | 0,0          | 0,0         | 5,8         |
| $\beta$ -lactamase-sensitive penicillins       | 4,7              | 7,5        | 0,0           | 0,0           | 6,3          | 3,0         | 3,5         |
| 1 <sup>st</sup> generation cephalosporins      | 7,0              | 11,3       | 0,0           | 0,0           | 18,8         | 0,0         | 3,5         |
| 2 <sup>nd</sup> generation cephalosporins      | 1,3              | 0,9        | 0,0           | 0,0           | 0,0          | 0,0         | 3,5         |
| 3 <sup>rd</sup> generation cephalosporins      | 16,9             | 29,2       | 0,0           | 6,7           | 15,6         | 18,2        | 8,1         |
| Carbapenems                                    | 4,0              | 1,9        | 0,0           | 3,3           | 6,3          | 9,1         | 4,7         |
| Fluoroquinolones                               | 2,7              | 2,8        | 0,0           | 6,7           | 6,3          | 3,0         | 0,0         |
| Aminoglycosides                                | 15,9             | 9,4        | 50,0          | 3,3           | 6,3          | 6,1         | 30,2        |
| Macrolides                                     | 2,0              | 2,8        | 0,0           | 3,3           | 0,0          | 6,1         | 0,0         |
| Tetracyclines                                  | 0,3              | 0,9        | 0,0           | 0,0           | 0,0          | 0,0         | 0,0         |
| Clindamycin                                    | 0,7              | 1,9        | 0,0           | 0,0           | 0,0          | 0,0         | 0,0         |
| Metronidazole                                  | 3,7              | 2,8        | 0,0           | 0,0           | 15,6         | 3,0         | 2,3         |
| Combinations of sulfonamides and trimethoprim  | 7,0              | 2,8        | 0,0           | 36,7          | 6,3          | 15,2        | 0,0         |

1  
2  
3  
4  
5  
6  
7  
8  
9  
10  
11  
12  
13  
14  
15  
16  
17  
18  
19  
20  
21  
22  
23  
24  
25  
26  
27  
28  
29  
30  
31  
32  
33  
34  
35  
36  
37  
38  
39  
40  
41  
42  
43  
44  
45  
46  
47  
48  
49  
50  
51  
52  
53  
54  
55  
56  
57  
58  
59  
60

|                |    |   |   |   |   |   |   |
|----------------|----|---|---|---|---|---|---|
| Linezolid      | 2  | 1 | 0 | 1 | 0 | 0 | 0 |
| Vancomycin PO  | 1  | 0 | 0 | 1 | 0 | 3 |   |
| Vancomycin IV  | 16 | 4 | 0 | 1 | 1 | 0 | 7 |
| Nitrofurantoin | 1  | 1 | 0 | 0 | 0 | 0 | 0 |
| Rifampicin     | 1  | 0 | 0 | 1 | 0 | 0 | 0 |
| Other          | 4  | 2 | 0 | 2 | 0 | 0 | 0 |

Abbreviations: AMW, adult medical ward; HO-AMW, hematology-oncology-AMW, T-AMW, transplant-AMW; P-AMW, pneumology-AMW; ASW, adult surgical ward; AICU, adult intensive care unit

Confidential

**Table 8.** Antimicrobial Resistance Rates

| <b>Multidrug-resistant organism</b> | <b>Total number of patients treated for MDRO, N</b> | <b>Overall prevalence of MDRO<sup>a</sup>, %</b> | <b>West<sup>a</sup>, %</b> | <b>Central<sup>a</sup>, %</b> | <b>Atlantic<sup>a</sup>, %</b> |
|-------------------------------------|-----------------------------------------------------|--------------------------------------------------|----------------------------|-------------------------------|--------------------------------|
| MRSA                                | 82                                                  | 5.6                                              | 9.5                        | 4.2                           | 0.5                            |
| MRCoNS                              | 33                                                  | 2.2                                              | 2.2                        | 2.5                           | 1.4                            |
| VRE                                 | 10                                                  | 0.7                                              | 0.7                        | 0.8                           | 0                              |
| ESBL-producing Enterobacteriaceae   | 41                                                  | 2.8                                              | 4.1                        | 1.5                           | 3.7                            |
| 3-ceph                              | 60                                                  | 4.1                                              | 4.9                        | 2.7                           | 6.8                            |
| CRE                                 | 5                                                   | 0.3                                              | 0.9                        | 0                             | 0                              |
| ESBL-NF                             | 22                                                  | 1.5                                              | 2.2                        | 1.3                           | 0.5                            |
| CR-NF                               | 25                                                  | 1.7                                              | 1.7                        | 1.8                           | 1.4                            |
| Other MDRO                          | 75                                                  | 5.1                                              | 8.4                        | 3.4                           | 2.7                            |

<sup>a</sup>Number of patients treated for MDRO on number of patients receiving antimicrobials for targeted use

Abbreviations: MDRO, multidrug-resistant organism; MRSA, methicillin-resistant *Staphylococcus aureus*; MRCoNS, methicillin-resistant coagulase negative staphylococci; VRE, Vancomycin-resistant enterococci; ESBL, bacteria producing extended-spectrum beta-lactamases; 3-ceph, 3<sup>rd</sup> generation cephalosporin resistant *Enterobacteriales*; CRE, carbapenem-resistant *Enterobacteriale*; ESBL-NF, ESBL-producing non-fermenter Gram-negative bacilli; CR-NF, carbapenem-resistant non-fermenter Gram-negative bacilli.



**Supplementary Material Table 1.** Antimicrobial Prevalence by Medical Prophylaxis Site for Adult, Pediatric and Neonatal Wards

| <b>Adult</b>                                                                | <b>All wards</b> | <b>AMW</b> | <b>HO-AMW</b> | <b>T-AMW</b>  | <b>P-AMW</b> | <b>ASW</b>  | <b>AICU</b> |
|-----------------------------------------------------------------------------|------------------|------------|---------------|---------------|--------------|-------------|-------------|
| <b>Total number of antimicrobials prescribed for medical prophylaxis, N</b> | 749              | 227        | 175           | 178           | 37           | 73          | 59          |
| <b>Prophylaxis site, N</b>                                                  |                  |            |               |               |              |             |             |
| Fever in a neutropenic patient                                              | 2                | 0          | 2             | 0             | 0            | 0           | 0           |
| General medical prophylaxis without targeting a specific site               | 425              | 86         | 158           | 115           | 9            | 27          | 30          |
| Medical prophylaxis for maternal risk factors                               | 6                | 6          | 0             | 0             | 0            | 0           | 0           |
| Other                                                                       | 15               | 7          | 1             | 0             | 3            | 0           | 4           |
| Bone and Joint                                                              | 16               | 9          | 0             | 1             | 0            | 6           | 0           |
| Central Nervous System                                                      | 3                | 2          | 0             | 0             | 0            | 1           | 0           |
| Cardiovascular System                                                       | 3                | 3          | 0             | 0             | 0            | 0           | 0           |
| Ear, Nose, Throat                                                           | 16               | 3          | 0             | 10            | 0            | 0           | 3           |
| Gastrointestinal Tract                                                      | 57               | 23         | 1             | 11            | 1            | 13          | 8           |
| Obstetrics or Gynecological                                                 | 7                | 3          | 0             | 0             | 0            | 4           | 0           |
| Respiratory Tract                                                           | 165              | 64         | 11            | 40            | 24           | 12          | 14          |
| Urinary Tract                                                               | 30               | 19         | 1             | 0             | 0            | 10          | 0           |
| Tuberculosis                                                                | 1                | 0          | 0             | 1             | 0            | 0           | 0           |
| Unknown                                                                     | 3                | 2          | 1             | 0             | 0            | 0           | 0           |
| <b>Pediatric and Neonatal</b>                                               | <b>All wards</b> | <b>PMW</b> | <b>GNMW</b>   | <b>HO-PMW</b> | <b>PSW</b>   | <b>PICU</b> | <b>NICU</b> |
| <b>Total number of antimicrobials prescribed for medical prophylaxis, N</b> | 76               | 7          | 2             | 24            | 4            | 9           | 30          |
| <b>Prophylaxis site, N</b>                                                  |                  |            |               |               |              |             |             |
| General medical prophylaxis without targeting a specific site               | 28               | 0          | 0             | 16            | 1            | 3           | 8           |

|                                                           |    |   |   |   |   |   |    |
|-----------------------------------------------------------|----|---|---|---|---|---|----|
| Medical prophylaxis<br>for newborn risk<br>factors        | 14 | 0 | 2 | 0 | 0 | 0 | 12 |
| Respiratory Tract                                         | 13 | 3 | 0 | 6 | 0 | 4 | 0  |
| Urinary Tract                                             | 4  | 2 | 0 | 0 | 0 | 0 | 2  |
| PUO/PUO-HO                                                | 6  | 2 | 0 | 2 | 2 | 0 | 0  |
| Bacteremia with no<br>clear anatomic site<br>and no shock | 10 | 0 | 0 | 0 | 0 | 2 | 8  |
| Skin, soft tissue                                         | 1  | 0 | 0 | 0 | 1 | 0 | 0  |

Abbreviations: AMW, adult medical ward; HO-AMW, hematology-oncology-AMW, T-AMW, transplant-AMW; P-AMW, pneumology-AMW; ASW, adult surgical ward; AICU, adult intensive care unit

Confidential

**Supplementary Material Table 2.** Antimicrobial Prevalence by Surgical Prophylaxis Site for Adult, Pediatric and Neonatal Wards

| <b>Adult</b>                                                                 | <b>All wards</b> | <b>AMW</b> | <b>HO-AMW</b> | <b>T-AMW</b>  | <b>P-AMW</b> | <b>ASW</b>  | <b>AICU</b> |
|------------------------------------------------------------------------------|------------------|------------|---------------|---------------|--------------|-------------|-------------|
| <b>Total number of antimicrobials prescribed for surgical prophylaxis, N</b> | 567              | 86         | 4             | 0             | 1            | 403         | 73          |
| <b>Prophylaxis site, N</b>                                                   |                  |            |               |               |              |             |             |
| General surgical prophylaxis without targeting a specific site               | 11               | 0          | 4             | 0             | 0            | 7           | 0           |
| Other                                                                        | 2                | 0          | 0             | 0             | 0            | 0           | 2           |
| Bone and Joint                                                               | 176              | 10         | 0             | 0             | 0            | 158         | 8           |
| Central Nervous System                                                       | 29               | 4          | 0             | 0             | 0            | 14          | 11          |
| Cardiovascular System                                                        | 107              | 19         | 0             | 0             | 0            | 44          | 44          |
| Ear, Nose, Throat                                                            | 31               | 3          | 0             | 0             | 0            | 26          | 2           |
| Gastrointestinal Tract                                                       | 78               | 6          | 0             | 0             | 0            | 67          | 5           |
| Obstetrics or Gynecological                                                  | 68               | 38         | 0             | 0             | 0            | 30          | 0           |
| Respiratory Tract                                                            | 7                | 0          | 0             | 0             | 1            | 6           | 0           |
| Urinary Tract                                                                | 58               | 6          | 0             | 0             | 0            | 51          | 1           |
| <b>Pediatric and Neonatal</b>                                                | <b>All wards</b> | <b>PMW</b> | <b>GNMW</b>   | <b>HO-PMW</b> | <b>PSW</b>   | <b>PICU</b> | <b>NICU</b> |
| <b>Total number of antimicrobials prescribed for surgical prophylaxis, N</b> | 11               | 3          | 0             | 0             | 5            | 0           | 3           |
| <b>Prophylaxis site, N</b>                                                   |                  |            |               |               |              |             |             |
| Bone and Joint                                                               | 2                | 0          | 0             | 0             | 2            | 0           | 0           |
| Ear, Nose, Throat                                                            | 1                | 0          | 0             | 0             | 1            | 0           | 0           |
| Gastrointestinal Tract                                                       | 8                | 3          | 0             | 0             | 2            | 0           | 3           |

Abbreviations: AMW, adult medical ward; HO-AMW, hematology-oncology-AMW, T-AMW, transplant-AMW; P-AMW, pneumology-AMW; ASW, adult surgical ward; AICU, adult intensive care unit

Fig. 1a

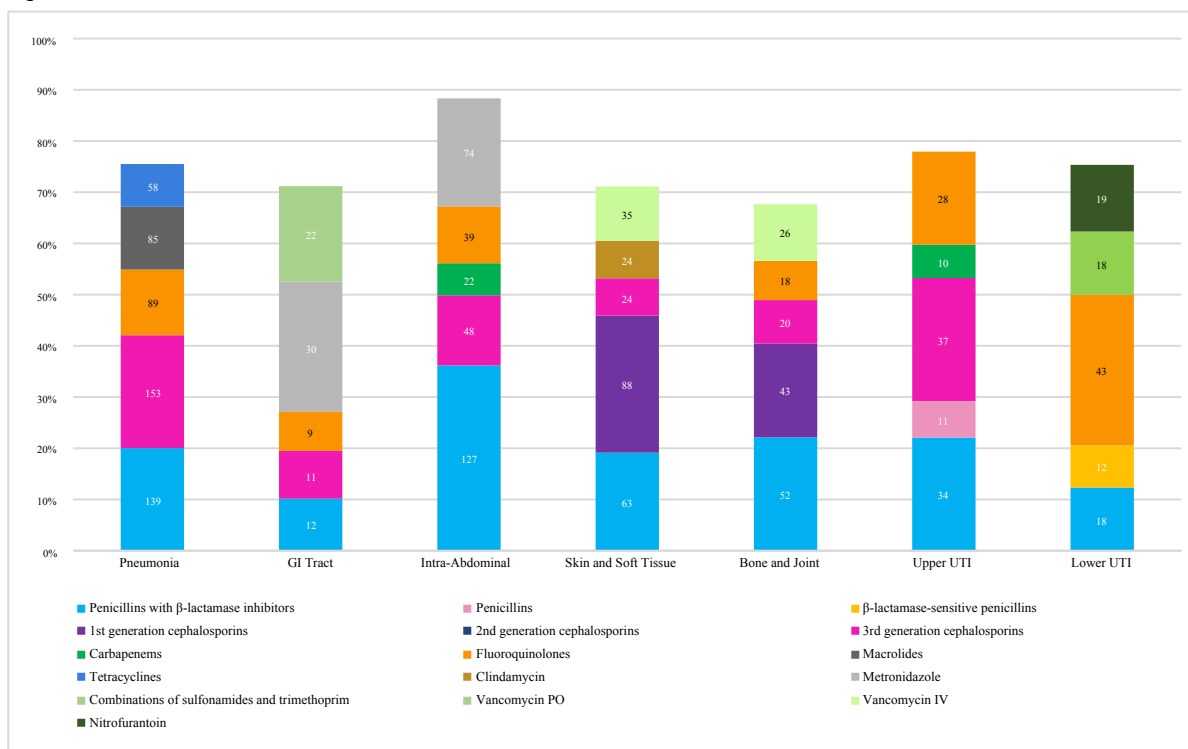

1  
2  
3  
4  
5  
6  
7  
8  
9  
10  
11  
12  
13  
14  
15  
16  
17  
18  
19  
20  
21  
22  
23  
24  
25  
26  
27  
28  
29  
30  
31  
32  
33  
34  
35  
36  
37  
38  
39  
40  
41  
42  
43  
44  
45  
46  
47  
48  
49  
50  
51  
52  
53  
54  
55  
56  
57  
58  
59  
60

Confidential

Fig. 1b

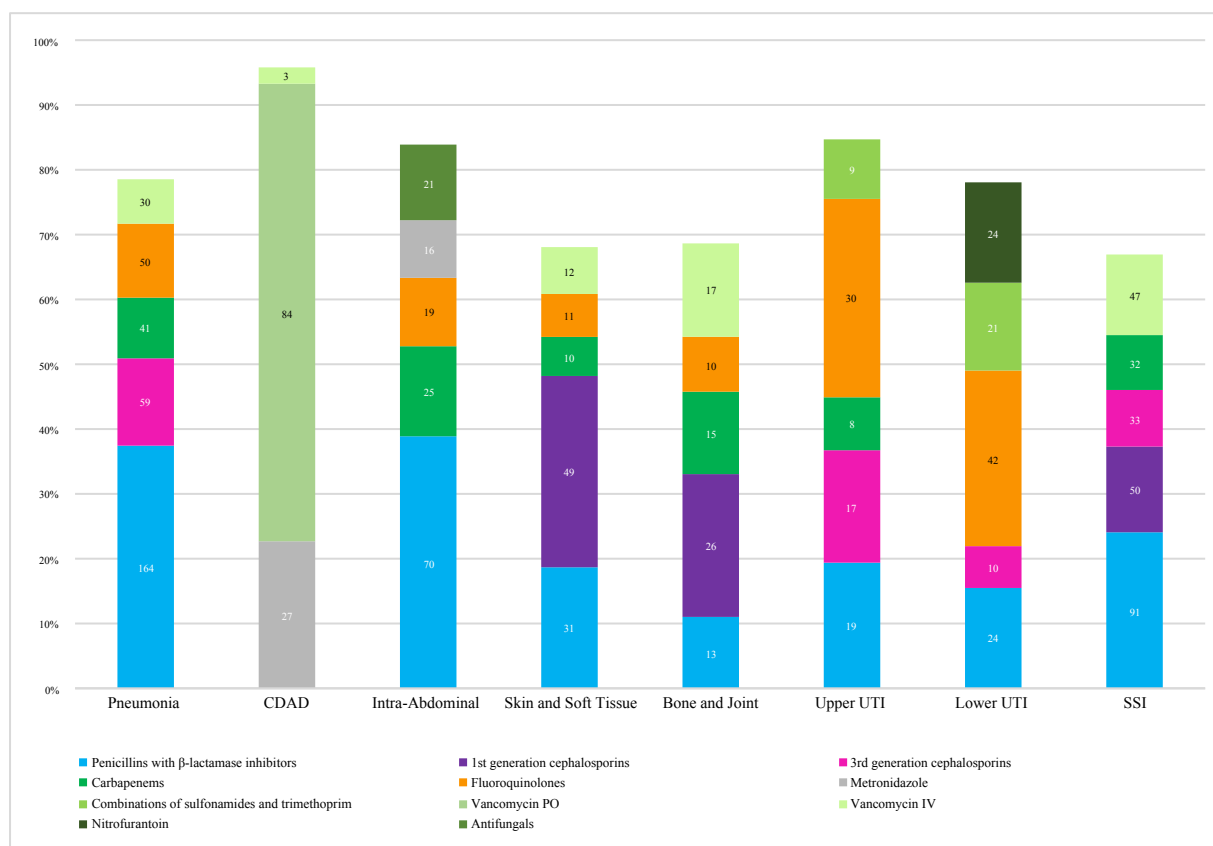

Fig.2 (supplemental)

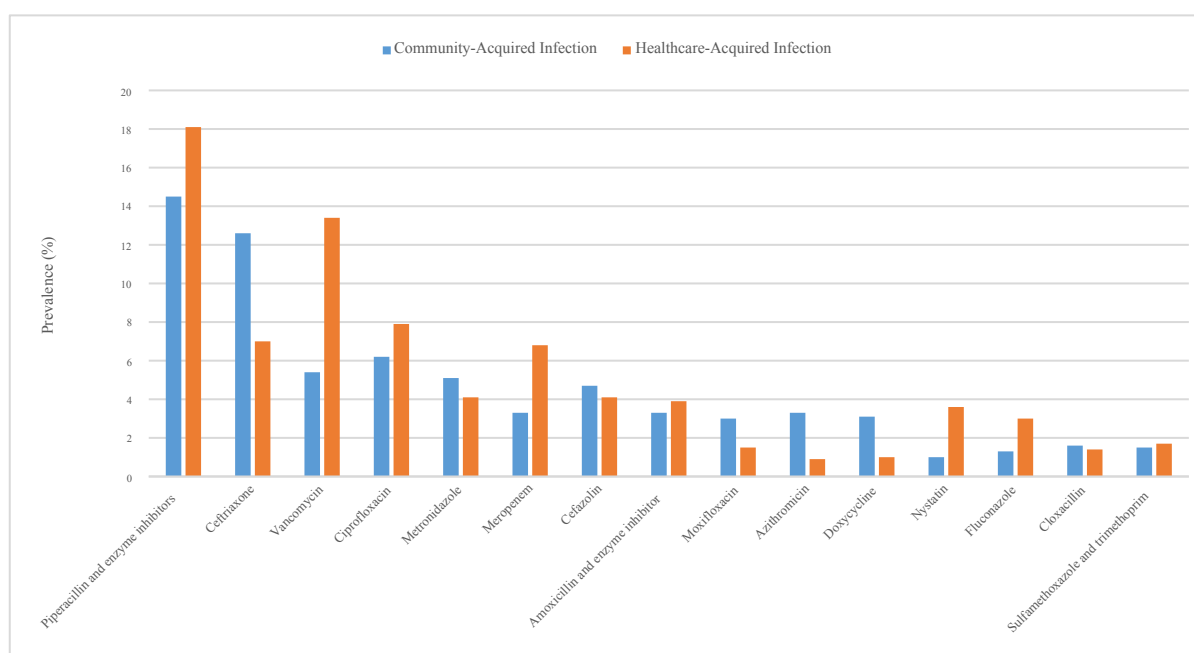

## Community-A Healthcare-Acquired Infection

Piperacillin and enzyme

inhibitors

14.5 18.1

Ceftriaxone

12.6 7.0

Vancomycin

5.4 13.4

Ciprofloxacin

6.2 7.9

Metronidazole

5.1 4.1

Meropenem

3.3 6.8

Cefazolin

4.7 4.1

Amoxicillin and enzyme in

3.3 3.9

Moxifloxacin

3.0 1.5

Azithromycin

3.3 0.9

Doxycycline

3.1 1.0

Nystatin

1.0 3.6

Fluconazole

1.3 3.0

Cloxacillin

1.6 1.4

Sulfamethoxazole and trir

1.5 1.7

Fig. 3 (supplemental)

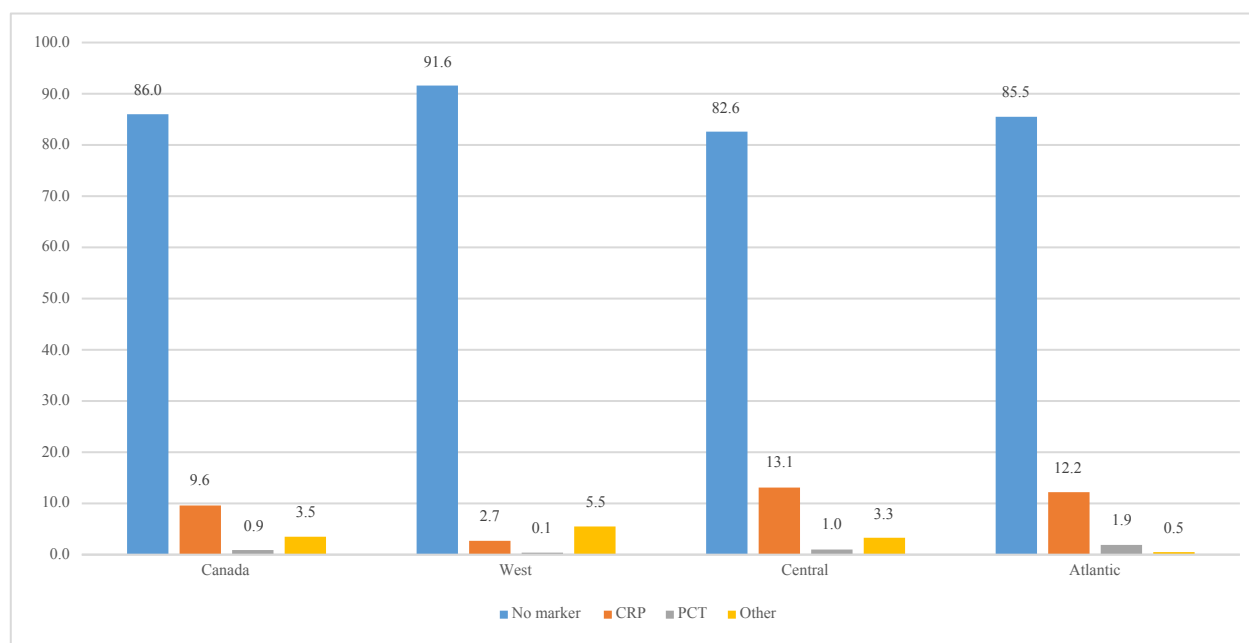

|           | Canada | West | Central | Atlantic |
|-----------|--------|------|---------|----------|
| No marker | 86.0   | 91.6 | 82.6    | 85.5     |
| CRP       | 9.6    | 2.7  | 13.1    | 12.2     |
| PCT       | 0.9    | 0.1  | 1.0     | 1.9      |
| Other     | 3.5    | 5.5  | 3.3     | 0.5      |
